# Supplementary material for: Mechanistic insights in the olefin epoxidation with cyclohexyl hydroperoxide
Source: Royal Society of Chemistry journal article supplement (doi:10.1039/c2cy00455k), 2012-01-01
Supplement: c2cy00455k.pdf [file c2cy00455k.pdf]

# Mechanistic Insights in the Olefin Epoxidation with Cyclohexyl Hydroperoxide

Bart P. C. Hereijgers<sup>a</sup>, Rudy F. Parton<sup>b</sup> and Bert M. Weckhuysen<sup>a\*</sup>

<sup>a\*</sup>*Inorganic Chemistry and Catalysis group, Debye Institute for NanoMaterials Science, Utrecht University, Universiteitsweg 99, 3584 CG Utrecht, The Netherlands. Email: b.m.weckhuysen@uu.nl; Fax: +31-(0)30-2511027; Tel: +31-(0)30 2537400*

<sup>b</sup>*DSM Research Industrial Chemicals, P.O. Box 18, 6160 MD Geleen, The Netherlands*

## Supporting Information – Detail on Catalyst Characterization

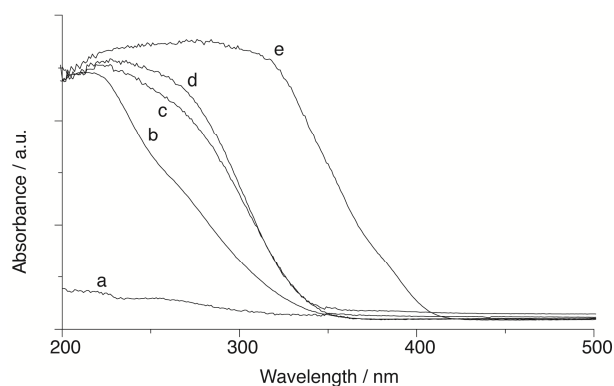

**Figure S1.** Diffuse reflectance UV-Vis spectra of SBA-15 (a), Ti-BEA (b), Ti-G40-SBA (c), Ti-G80-SBA (d) and bulk TiO<sub>2</sub> P25 (e). Ti-BEA contains Ti<sup>4+</sup>-ion exclusively in isolated tetrahedral coordination, whereas in TiO<sub>2</sub> P25 all Ti<sup>4+</sup>-ions are located in octahedral sites.

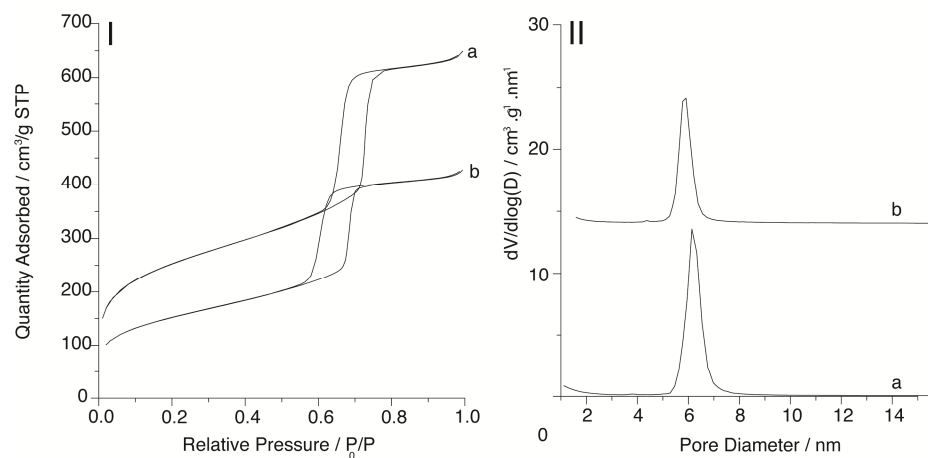

**Figure S2.** N<sub>2</sub>-physorption isotherms (I) and pore size distributions (II) of SBA-15 (a) and Ti-G40-SBA (b) confirming the SBA-15 structure of the catalyst materials.

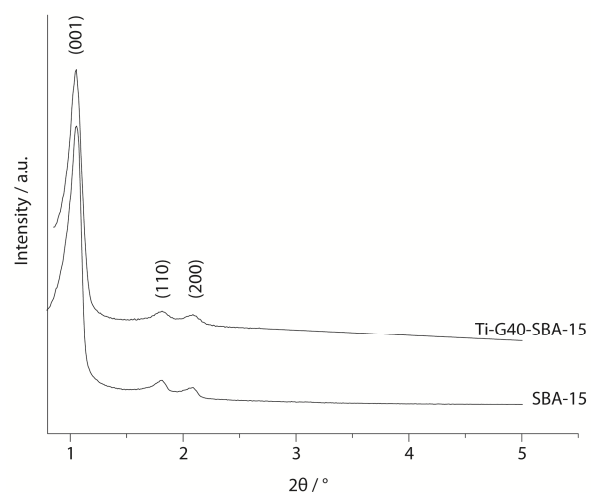

**Figure S3.** Small angle powder XRD patterns of SBA-15 and Ti-G40-SBA, illustrating that the SBA-15 structure remains preserved after Ti grafting.
